# Supplementary material for: Glass-based LED system for indoor horticulture: enhanced plant growth through Sm3+ and Tm3+ co-doped luminescent glasses
Source: Royal Society of Chemistry journal article supplement (doi:10.1039/d3cp03440b), 2023-01-01
Supplement: d3cp03440b1.pdf [file d3cp03440b1.pdf]

Supplementary Material

**Glass-Based LED System for Indoor Horticulture: Enhanced Plant Growth through  $\text{Sm}^{3+}$  and  $\text{Tm}^{3+}$  Co-Doped Luminescent Glasses**

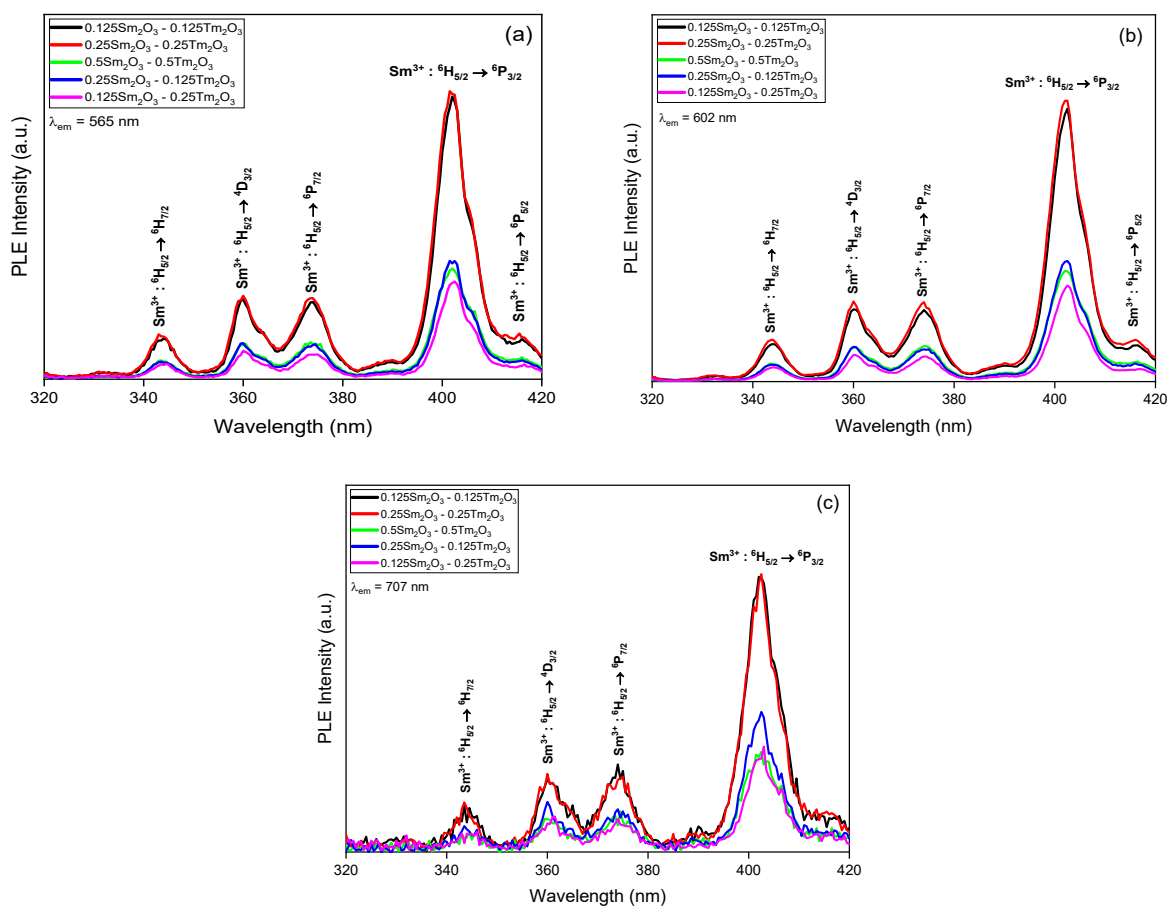

**Fig. S1** PL excitation spectra of  $\text{Sm}^{3+}$  and  $\text{Tm}^{3+}$  co-doped glasses, with (a) monitoring of 565 nm, (b) 602 nm, and (c) 707 nm  $\text{Sm}^{3+}$  ion emissions.

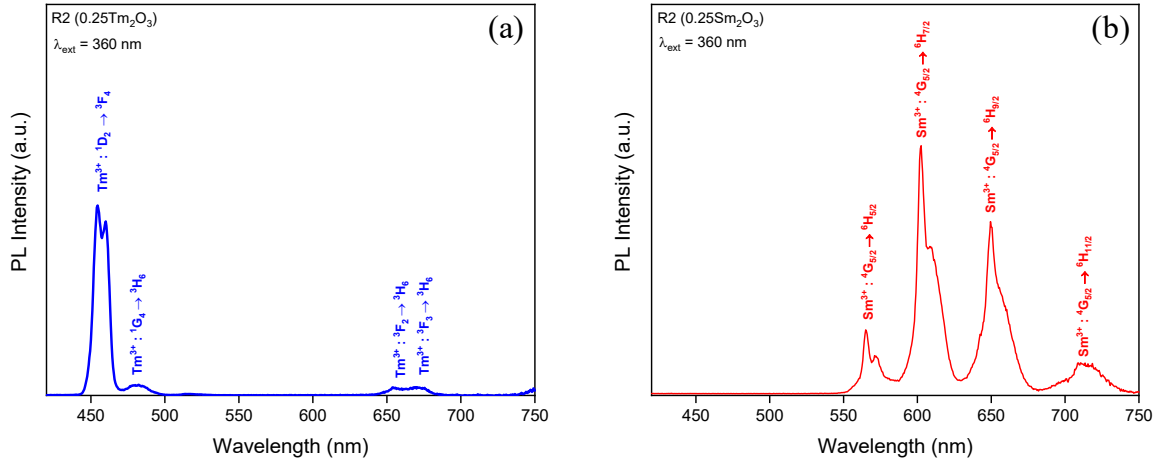

**Fig. S2** PL spectra of two reference samples (R1 and R2) prepared with the same base glass composition as the Sm<sup>3+</sup> and Tm<sup>3+</sup> co-doped samples, except for the fact that R1 contains only 0.25 mol% Tm<sub>2</sub>O<sub>3</sub> and R2 contains only 0.25 mol% Sm<sub>2</sub>O<sub>3</sub> under 360 nm excitation.
